# Supplementary material for: Dexamethasone Suppression Test May Predict More Severe/Violent Suicidal Behavior
Source: Front Psychiatry. 2020 Mar 4;11:97. doi: 10.3389/fpsyt.2020.00097 (PMC7065044; doi:10.3389/fpsyt.2020.00097)
Supplement: Supplementary file 1 [file DataSheet_1.xlsx]

## Sheet: Sheet1
Subject	age	Sex	N_children	Study_Le	Smoke	N_Cigarretes	Regularity	History_suic	SA	Violent_Severe	Followup_SA	Clin_impresion	Bipolar	Anxiety	Eating	Substance	Alcohol	PTSD	psycho	Antipsychotic	Lithium	Anxiolitic	Antidepresant	Antiepileptic	HAM	RRRS_Ris	RRRS_Res	RRRS_Rat	SIS_Pla	SIS_Con	SIS_Tot	CTQ_Physabu	CTQ_Emoneg	CTQ_Phyneg	CTQ_Sexabu	CTQ_Emoabu	BMI	ZPre_Cor8	ZPre_Cor15	ZPre_Cor21	ZPos_Cor8	ZPos_Cor15	ZPos_Cor21	R_RRRSRI	R_RRRSRE	R_RRRSRA	R_SISP	R_SISC	R_SIST
1	24.2847	2	0	15	1	9	0	1	1	0	1	2	1	1	0	1	1	#NULL!	1	0	0	1	0	1	23	8	13	38.0952	4	7	11	0	0	0	0	0	17.2635	-0.474049	-0.621752	-0.010082	-0.464357	-0.077879	-0.651951	5	8	12	40	2	3
2	39.5017	1	3	12	0	0	#NULL!	0	1	1	0	4	0	0	0	0	0	0	1	1	0	0	1	1	14	#NULL!	13	#NULL!	2	8	10	1	1	0	0	0	26.5731	-0.641249	0.531401	1.06977	2.41022	4.27986	1.57809	#NULL!	#NULL!	#NULL!	#NULL!	#NULL!	#NULL!
3	50.0233	2	3	10	1	24	0	1	1	0	0	3	1	1	0	0	0	1	1	1	0	1	0	1	20	7	15	33.3333	9	8	17	#NULL!	#NULL!	#NULL!	#NULL!	#NULL!	23.1405	0.402804	-0.396423	0.044693	-0.391451	-0.458786	-0.651951	#NULL!	#NULL!	#NULL!	#NULL!	#NULL!	#NULL!
4	18.7351	2	0	12	0	0	1	1	1	0	0	3	1	1	0	0	0	0	1	0	0	0	0	1	11	8	11	42.1053	5	11	16	0	1	1	0	1	18.0427	0.71602	1.9109	1.55492	4.70935	4.41012	0.587295	#NULL!	#NULL!	#NULL!	#NULL!	#NULL!	#NULL!
5	45.0021	1	1	16	0	25.5	#NULL!	1	1	1	0	4	0	1	0	1	1	0	1	0	0	1	1	0	4	9	13	60	13	14	27	0	0	0	0	1	23.1481	-0.661676	-0.031411	-0.604784	-0.464357	-0.350237	-0.487317	#NULL!	#NULL!	#NULL!	#NULL!	#NULL!	#NULL!
6	52.1396	1	2	15	1	5.1	#NULL!	1	1	0	0	3	0	1	0	1	1	1	1	1	0	1	1	0	13	10	8	55.5556	6	11	17	1	1	1	1	1	#NULL!	0.052672	-0.758754	#NULL!	-0.681911	-0.419207	-0.066543	#NULL!	#NULL!	#NULL!	#NULL!	#NULL!	#NULL!
7	35.5647	2	1	12	1	5	0	0	1	0	0	3	1	1	0	0	0	1	1	1	1	0	0	1	14	6	#NULL!	#NULL!	12	13	25	1	1	1	1	1	22.7615	-0.51566	#NULL!	0.529844	0.972929	0.956294	0.422661	#NULL!	#NULL!	#NULL!	#NULL!	#NULL!	#NULL!
8	25.8344	2	0	17	0	0	1	1	1	1	1	2	0	1	0	0	0	0	1	1	0	0	1	0	7	6	13	31.5789	3	9	12	#NULL!	#NULL!	#NULL!	#NULL!	#NULL!	#NULL!	-0.620066	-0.228191	-0.117676	0.327192	0.085931	-0.158049	#NULL!	#NULL!	#NULL!	#NULL!	#NULL!	#NULL!
9	47.5455	1	2	17	1	9.8	#NULL!	1	1	1	#NULL!	3	#NULL!	0	0	0	1	0	1	1	0	1	0	0	16	9	15	40.9091	4	12	16	0	1	1	0	1	#NULL!	0.030914	-0.087215	0.311393	0.016934	-0.166243	-0.344174	#NULL!	#NULL!	#NULL!	#NULL!	#NULL!	#NULL!
10	29.6865	1	1	12	1	12	#NULL!	1	1	0	1	3	0	1	0	1	0	1	1	1	0	1	0	0	11	9	13	42.8571	10	14	24	1	1	1	0	1	#NULL!	2.47049	0.841355	0.854583	0.540702	0.411577	0.503481	#NULL!	#NULL!	#NULL!	#NULL!	#NULL!	#NULL!
11	52.0767	2	1	12	1	29.3	#NULL!	0	1	0	0	3	0	1	0	0	0	0	1	0	0	1	1	0	16	8	13	38.0952	11	11	22	1	1	0	0	1	#NULL!	-0.891671	-0.762455	-0.604784	-0.607565	-0.458786	-0.651951	#NULL!	#NULL!	#NULL!	#NULL!	#NULL!	#NULL!
12	56.898	2	2	16	0	0	0	0	1	0	1	3	1	1	0	0	0	0	1	1	0	1	1	0	7	8	11	42.1053	10	9	19	0	1	1	0	1	#NULL!	-0.136851	-0.112924	0.044277	0.4677	-0.022399	0.009486	#NULL!	#NULL!	#NULL!	#NULL!	#NULL!	#NULL!
13	58.1027	2	3	9	0	0	#NULL!	0	1	0	#NULL!	3	0	1	0	0	0	0	1	0	0	1	1	0	16	8	#NULL!	#NULL!	12	14	26	#NULL!	#NULL!	#NULL!	#NULL!	#NULL!	#NULL!	-0.023139	-0.671712	-0.737809	-0.677867	-0.350237	-0.651951	#NULL!	#NULL!	#NULL!	#NULL!	#NULL!	#NULL!
14	23.6496	2	0	18	0	0	1	0	1	1	1	4	0	1	1	0	0	0	1	1	0	1	1	1	10	12	11	52.1739	6	11	17	#NULL!	#NULL!	#NULL!	#NULL!	#NULL!	18.4265	-1.09216	-0.861355	-0.84736	-0.680471	-0.514047	-0.735765	#NULL!	#NULL!	#NULL!	#NULL!	#NULL!	#NULL!
15	40.4162	1	2	14	1	37.5	#NULL!	0	1	0	0	3	0	1	0	1	1	0	1	1	0	0	1	1	10	7	15	58.3333	3	0	3	0	1	1	0	1	26.1619	-0.432439	-0.087488	-0.604784	-0.248243	-0.405498	-0.322683	#NULL!	#NULL!	#NULL!	#NULL!	#NULL!	#NULL!
16	51.937	1	3	11	1	21	#NULL!	1	1	0	0	3	0	1	0	0	1	0	1	1	0	1	1	0	17	9	15	37.5	3	11	14	#NULL!	#NULL!	#NULL!	#NULL!	#NULL!	#NULL!	-1.49692	-0.903158	-0.927566	-0.537263	-0.458786	-0.571131	#NULL!	#NULL!	#NULL!	#NULL!	#NULL!	#NULL!
17	31.332	2	0	11	1	1.6	1	1	1	0	1	2	0	1	0	0	1	1	1	1	0	0	1	1	18	7	14	#NULL!	3	12	15	1	1	0	#NULL!	1	31.975	0.50721	-0.594223	0.259881	0.111078	0.303028	-0.487317	2	8	15	34.78	1	1
18	43.091	2	3	12	1	26	1	1	1	1	1	4	0	1	0	1	1	1	1	0	0	1	0	1	8	8	14	36.3636	5	12	17	1	1	1	1	1	22.0522	0.862793	-0.25572	1.28496	-0.537263	-0.186427	0.009579	#NULL!	#NULL!	#NULL!	#NULL!	#NULL!	#NULL!
19	18.8337	2	0	11	1	5	1	1	1	0	0	2	0	1	1	1	0	1	1	0	0	1	0	1	5	8	11	42.1053	6	14	19	0	1	1	0	1	21.9713	-0.452866	-0.621752	-0.280046	-0.464357	-0.350237	-0.322683	#NULL!	#NULL!	#NULL!	#NULL!	#NULL!	#NULL!
20	50.0917	2	3	14	1	39.6	#NULL!	1	1	1	0	3	1	1	0	0	1	0	1	1	0	1	0	0	20	7	13	31.5789	11	12	23	1	1	1	1	1	21.4533	-0.244055	-0.481049	-0.495234	-0.607565	-0.405498	-0.735765	#NULL!	#NULL!	#NULL!	#NULL!	#NULL!	#NULL!
21	56.3422	2	2	11	0	0	#NULL!	0	1	0	1	3	1	1	0	0	0	0	1	1	0	1	0	0	10	9	11	45	8	11	19	#NULL!	#NULL!	#NULL!	#NULL!	#NULL!	#NULL!	0.110772	-0.594223	0.854583	0.397494	#NULL!	4.1404	#NULL!	#NULL!	#NULL!	#NULL!	#NULL!	#NULL!
22	54.1766	1	2	17	0	1.1	#NULL!	1	1	0	0	3	0	1	0	0	0	1	1	1	0	1	1	0	17	9	11	45	9	12	21	0	1	1	0	1	#NULL!	0.006255	0.284978	-0.374193	1.43827	#NULL!	0.809316	#NULL!	#NULL!	#NULL!	#NULL!	#NULL!	#NULL!
23	44.742	1	4	17	1	22.4	#NULL!	0	1	1	1	4	0	1	0	0	0	0	1	1	0	1	1	0	1	13	13	50	7	11	18	0	1	0	0	1	20.7612	0.540044	0.288392	1.18266	-0.254003	-0.088029	1.15636	17	9	6	60	11	6
24	46.5051	1	2	9	1	13.5	#NULL!	1	1	0	0	3	0	1	0	0	1	1	1	1	0	1	1	0	4	9	14	39.1304	4	11	15	1	1	1	1	1	21.3839	1.23629	0.139288	0.244738	-0.08413	-0.213454	-0.37392	#NULL!	#NULL!	#NULL!	#NULL!	#NULL!	#NULL!
25	27.6112	1	0	16	1	0.3	#NULL!	1	1	1	1	4	1	1	0	0	0	1	1	1	1	0	0	1	14	12	11	66.6667	7	14	21	1	0	1	1	1	21.4533	-0.430925	-0.001843	-0.38764	-0.534659	-0.403525	-0.487317	13	7	11	38.89	6	7
26	40.0438	2	2	18	1	9.5	1	0	1	1	0	4	1	1	0	0	1	1	1	1	0	1	0	0	15	13	15	54.1667	8	10	18	0	1	0	0	0	#NULL!	-0.85006	-0.368894	-0.927566	-0.537263	-0.514047	0.009579	#NULL!	#NULL!	#NULL!	#NULL!	#NULL!	#NULL!
27	53.7221	2	3	10	0	7	#NULL!	0	1	0	#NULL!	4	0	1	0	0	0	1	0	0	0	0	1	0	14	9	11	45	2	13	15	0	0	0	0	0	19.487	0.591188	0.053215	1.06977	-0.537263	-0.458786	-0.403503	#NULL!	#NULL!	#NULL!	#NULL!	#NULL!	#NULL!
28	66.7214	1	2	11	0	20	#NULL!	0	1	1	0	3	#NULL!	1	0	0	0	0	1	1	0	1	1	0	18	6	#NULL!	#NULL!	8	13	21	0	0	0	0	0	25.528	-1.0165	-0.115017	-0.712378	0.18138	-0.458786	#NULL!	#NULL!	#NULL!	#NULL!	#NULL!	#NULL!	#NULL!
29	49.9959	2	1	13	0	0	1	1	1	1	0	3	1	1	1	0	0	1	1	1	0	1	1	0	17	11	14	44	6	6	12	0	1	0	0	1	23.9361	-0.933282	-0.594223	-0.334821	-0.464357	-0.350237	-0.322683	#NULL!	#NULL!	#NULL!	#NULL!	#NULL!	#NULL!
30	53.577	2	0	17	0	12	#NULL!	0	1	0	0	3	0	1	1	0	1	0	1	1	0	1	0	0	10	10	13	43.4783	7	11	17	1	1	0	1	1	#NULL!	-0.308506	-0.531114	-0.388476	-0.789425	-0.426253	-0.727569	#NULL!	#NULL!	#NULL!	#NULL!	#NULL!	#NULL!
31	49.7769	2	3	9	0	0	#NULL!	1	1	0	0	4	1	1	1	0	0	0	1	1	0	0	0	0	13	9	#NULL!	#NULL!	6	11	17	0	1	0	0	0	#NULL!	0.799999	-0.594223	-0.495234	-0.105035	#NULL!	-0.158049	#NULL!	#NULL!	#NULL!	#NULL!	#NULL!	#NULL!
32	31.165	2	0	12	0	15	1	0	1	1	1	3	0	1	1	0	0	0	1	0	0	1	1	1	24	12	15	48	8	10	18	0	1	1	0	0	17.7096	3.05379	-0.143566	#NULL!	-0.537263	0.139219	0.255033	#NULL!	#NULL!	#NULL!	#NULL!	#NULL!	#NULL!
33	50.3491	2	2	11	1	11.5	1	1	1	0	1	3	0	1	1	0	1	1	1	1	0	1	1	0	14	6	14	30	4	6	8	0	1	0	#NULL!	1	21.6128	0.946015	-0.424972	-0.550009	-0.248243	-0.405498	-0.403503	22	9	14	39.13	8	14
34	19.2799	2	0	12	0	0	1	0	1	0	1	3	1	1	1	0	0	0	1	1	0	1	1	0	14	9	13	40.9091	6	8	12	0	0	1	0	1	20.202	0.110772	0.193918	0.854583	-0.03213	0.303028	0.255033	#NULL!	#NULL!	#NULL!	#NULL!	#NULL!	#NULL!
35	47.3402	2	4	17	0	0	0	#NULL!	1	1	1	4	1	1	0	0	0	0	0	0	0	0	0	1	16	13	14	48.1481	9	14	23	1	1	0	0	1	23.3011	1.80244	0.363169	0.745033	-0.321149	-0.294976	-0.074235	5	11	11	50	2	3
36	44.4572	2	1	15	0	0	0	0	1	1	0	3	1	1	1	1	0	1	1	0	0	1	0	1	20	13	13	64.2857	9	14	23	1	1	0	1	1	26.8923	-0.996076	-0.594223	-0.604784	-0.391451	-0.241689	-0.238869	#NULL!	#NULL!	#NULL!	#NULL!	#NULL!	#NULL!
37	48.2574	2	3	11	0	44	1	1	1	1	1	3	1	1	0	0	1	0	1	1	0	1	0	1	25	10	14	43.4783	6	12	17	1	1	1	1	1	#NULL!	2.57489	3.31793	0.42225	2.84244	#NULL!	#NULL!	4	7	15	31.82	1	3
38	43.6988	2	6	12	1	8.5	0	0	1	0	#NULL!	3	1	1	0	0	1	0	1	1	0	0	0	1	22	9	13	42.8571	6	9	13	0	0	1	0	0	21.7504	-0.30685	-0.424972	-0.550009	-0.607565	-0.458786	-0.735765	#NULL!	#NULL!	#NULL!	#NULL!	#NULL!	#NULL!
39	52.219	2	2	13	1	8.5	0	1	1	1	0	4	#NULL!	1	0	0	0	0	0	0	0	0	1	1	10	10	13	43.4783	6	13	19	0	0	0	0	1	21.875	-0.724471	-0.706378	-0.280046	-0.537263	-0.350237	-0.571131	#NULL!	#NULL!	#NULL!	#NULL!	#NULL!	#NULL!
40	37.4127	2	0	14	0	0	1	0	1	0	0	3	0	1	0	0	0	0	1	1	0	1	1	0	13	8	14	38.0952	7	10	17	0	1	0	1	1	24.0882	-1.12091	-0.734926	-0.819972	-0.607565	-0.43905	-0.487317	#NULL!	#NULL!	#NULL!	#NULL!	#NULL!	#NULL!
41	31.2991	1	0	14	1	13	#NULL!	#NULL!	1	0	1	3	0	1	0	1	1	1	1	0	0	1	0	0	6	8	11	44.4444	9	13	22	0	1	0	0	0	#NULL!	-0.661676	-0.25572	-0.604784	-0.248243	-0.350237	-0.487317	27	10	10	50	13	14
42	47.2361	1	3	11	0	17	#NULL!	0	1	0	0	1	#NULL!	0	0	0	0	0	1	1	0	1	1	0	16	5	14	26.3158	2	6	8	#NULL!	#NULL!	#NULL!	#NULL!	#NULL!	24.3025	-0.647926	-0.895339	-0.816966	-1.0152	#NULL!	-1.02503	#NULL!	#NULL!	#NULL!	#NULL!	#NULL!	#NULL!
43	42.5845	2	2	14	0	0	1	1	1	0	1	3	0	1	0	0	0	0	0	0	0	0	1	1	14	7	12	46.6667	7	12	19	0	0	0	1	0	27.5873	1.44686	-0.25572	-0.550009	-0.03213	-0.514047	-0.735765	#NULL!	#NULL!	#NULL!	#NULL!	#NULL!	#NULL!
44	31.332	2	0	17	0	0	0	1	1	0	1	2	0	1	0	0	0	0	1	1	0	1	1	0	14	7	#NULL!	#NULL!	4	4	8	1	1	0	#NULL!	0	#NULL!	-0.361322	3.57385	-0.657603	-0.248243	-0.442997	-0.571131	6	6	12	33.33	1	5
45	30.4175	2	0	12	1	9	1	1	1	0	1	2	1	1	0	1	1	0	1	1	0	1	0	1	18	8	15	34.7826	2	2	4	#NULL!	#NULL!	#NULL!	#NULL!	#NULL!	#NULL!	0.279485	-0.677829	0.639395	-0.175338	-0.350237	-0.568137	#NULL!	#NULL!	#NULL!	#NULL!	#NULL!	#NULL!
46	60.9199	2	3	11	0	33	#NULL!	0	1	0	0	3	1	1	0	0	0	0	1	1	0	1	1	0	15	7	11	38.8889	8	10	18	1	#NULL!	0	0	1	28.7201	-1.12091	-0.115017	-0.765197	0.900023	-0.350237	-0.322683	#NULL!	#NULL!	#NULL!	#NULL!	#NULL!	#NULL!
47	35.6359	2	1	15	0	0	1	0	1	0	0	3	0	0	0	0	0	0	1	0	0	1	0	0	10	9	#NULL!	#NULL!	9	11	20	0	0	0	1	0	18.6851	-0.494477	-0.537126	-0.712378	-0.537263	-0.405498	-0.487317	#NULL!	#NULL!	#NULL!	#NULL!	#NULL!	#NULL!
48	53.8097	1	1	11	1	28.5	#NULL!	0	1	0	1	3	0	1	0	0	0	0	1	1	0	1	1	0	7	7	9	43.75	11	14	25	1	1	1	0	1	25.2092	0.817092	0.504651	0.611336	1.13938	0.08813	1.88348	20	7	12	36.84	9	11
49	42.8419	2	3	16	0	2.6	0	1	1	1	0	4	0	1	0	0	0	0	1	0	0	1	1	0	15	11	12	47.8261	5	12	16	0	1	0	1	0	22.2041	-0.244055	1.96698	-0.38764	-0.464357	0.139219	1.99117	#NULL!	#NULL!	#NULL!	#NULL!	#NULL!	#NULL!
50	47.488	2	2	16	0	13.5	0	0	1	0	0	2	1	1	0	0	0	0	1	1	0	0	0	0	15	8	15	40	5	13	18	0	1	1	0	0	20.7756	-1.0793	-0.537126	-0.657603	-0.537263	-0.405498	#NULL!	#NULL!	#NULL!	#NULL!	#NULL!	#NULL!	#NULL!
51	27.5318	2	0	13	0	0	1	1	1	0	0	3	0	1	1	1	1	0	1	1	0	1	0	0	14	8	12	40	7	11	18	#NULL!	#NULL!	#NULL!	#NULL!	#NULL!	20.5499	-0.024205	-0.405912	-0.721746	-0.344315	-0.48967	-0.793672	#NULL!	#NULL!	#NULL!	#NULL!	#NULL!	#NULL!
52	55.4333	1	1	13	0	41	#NULL!	1	1	0	0	3	0	1	0	0	1	0	1	1	0	1	1	0	8	8	14	40	5	11	12	0	1	1	0	0	#NULL!	-1.34852	-0.872575	-0.848706	-0.985101	-0.447392	-0.892826	#NULL!	#NULL!	#NULL!	#NULL!	#NULL!	#NULL!
53	38.6092	1	0	15	1	24	#NULL!	1	1	0	0	3	0	1	0	1	0	0	1	1	0	1	0	0	23	8	11	44.4444	6	12	18	0	0	0	0	0	#NULL!	-0.273694	-0.657454	-0.374193	-0.810928	-0.286031	-0.1029	#NULL!	#NULL!	#NULL!	#NULL!	#NULL!	#NULL!
54	45.1253	1	0	12	1	24.6	#NULL!	1	1	1	1	4	0	1	0	1	1	1	#NULL!	#NULL!	#NULL!	#NULL!	#NULL!	#NULL!	17	8	11	42.1053	9	13	22	#NULL!	#NULL!	#NULL!	#NULL!	#NULL!	24.6914	2.32998	-0.029166	-0.374193	-0.514188	-0.286031	0.809316	#NULL!	#NULL!	#NULL!	#NULL!	#NULL!	#NULL!
55	51.2416	2	2	14	0	0	1	0	1	0	0	3	0	1	1	0	0	0	0	0	0	0	1	0	10	8	12	41.1765	4	12	16	1	0	1	0	1	23.1473	-0.223628	-0.031411	-0.550009	-0.680471	-0.514047	-0.571131	#NULL!	#NULL!	#NULL!	#NULL!	#NULL!	#NULL!
56	27.7618	1	0	15	0	18	#NULL!	0	1	1	0	4	0	0	0	1	0	0	1	1	0	0	0	1	9	#NULL!	13	#NULL!	6	7	13	0	1	0	0	1	#NULL!	1.38482	2.41764	1.98725	0.972929	0.522099	2.65271	#NULL!	#NULL!	#NULL!	#NULL!	#NULL!	#NULL!
57	50.7625	2	2	12	1	19	#NULL!	1	1	1	0	4	1	1	1	0	0	0	1	1	0	0	0	1	14	8	9	47.0588	13	14	27	1	1	0	0	1	#NULL!	-0.098039	-0.565675	4.4717	-0.537263	-0.350237	0.835743	#NULL!	#NULL!	#NULL!	#NULL!	#NULL!	#NULL!
58	19.822	2	0	13	0	0.25	1	0	1	0	1	3	0	1	1	0	0	0	0	0	0	0	1	1	21	7	15	35	6	12	18	0	1	1	1	1	18.1787	-1.20489	-0.6503	-0.280046	-0.537263	-0.350237	-0.238869	#NULL!	#NULL!	#NULL!	#NULL!	#NULL!	#NULL!
59	30.7105	1	0	14	0	0	#NULL!	0	1	0	1	1	0	0	0	0	0	0	1	0	0	1	1	0	4	7	14	33.3333	4	6	10	0	1	1	0	1	24.0741	-0.026922	-0.639085	-0.718247	-0.716924	-0.486416	-0.660931	15	7	12	36.84	6	9
60	48.3888	1	5	9	0	0	#NULL!	0	1	1	1	4	0	0	0	0	0	0	1	1	0	0	1	1	14	9	14	40.9091	4	14	16	#NULL!	#NULL!	#NULL!	#NULL!	#NULL!	27.0416	-0.265239	-0.45352	-0.604784	-0.537263	-0.514047	-0.651951	19	8	11	42.11	7	12
61	49.9603	2	2	15	0	0	#NULL!	0	1	0	0	3	0	0	0	0	0	0	1	0	0	1	1	0	10	8	13	38.0952	4	9	13	0	1	0	1	0	21.0937	-0.572499	0.868876	-0.436086	-0.172292	-0.48967	-0.99198	#NULL!	#NULL!	#NULL!	#NULL!	#NULL!	#NULL!
62	39.8795	2	2	12	0	3.5	1	1	1	0	0	3	0	1	0	0	0	0	1	1	0	0	1	1	17	6	13	31.5789	4	0	4	0	1	#NULL!	0	#NULL!	#NULL!	0.695593	0.447795	-0.712378	-0.464357	-0.186427	0.751929	#NULL!	#NULL!	#NULL!	#NULL!	#NULL!	#NULL!
63	31.8166	2	0	9	1	0.1	0	1	1	1	0	3	1	1	0	1	0	1	1	1	0	1	1	0	7	6	13	31.5789	3	4	7	1	1	1	0	1	16.025	0.089588	-0.424972	-0.874747	-0.03213	-0.405498	-0.403503	#NULL!	#NULL!	#NULL!	#NULL!	#NULL!	#NULL!
64	33.8261	2	2	16	0	0	0	1	1	0	0	2	0	0	0	0	1	0	1	0	0	1	1	0	5	9	13	50	10	6	16	0	1	0	1	1	#NULL!	-1.66183	-0.781519	-0.801096	0.255616	0.116315	-0.958928	#NULL!	#NULL!	#NULL!	#NULL!	#NULL!	#NULL!
65	53.87	1	3	18	1	22.5	#NULL!	0	1	1	0	3	0	1	0	0	0	0	1	1	0	0	1	1	16	6	#NULL!	#NULL!	10	14	24	0	0	1	0	0	21.1463	0.71602	1.48879	1.98725	1.47546	1.77337	2.65271	#NULL!	#NULL!	#NULL!	#NULL!	#NULL!	#NULL!
66	48.0356	2	2	9	1	17	#NULL!	1	1	0	1	2	1	1	0	0	0	1	1	1	0	0	0	1	28	8	#NULL!	#NULL!	7	12	19	#NULL!	#NULL!	#NULL!	#NULL!	#NULL!	28.8275	-0.641249	-0.05894	-0.344602	1.25934	0.249741	-0.238869	#NULL!	#NULL!	#NULL!	#NULL!	#NULL!	#NULL!
67	51.9206	2	1	14	1	6.8	#NULL!	0	1	0	0	3	0	1	0	0	1	0	1	1	0	1	1	0	7	7	7	50	10	11	21	0	#NULL!	0	0	0	19.4674	-0.972841	3.17943	2.78553	2.70695	3.40695	1.61907	#NULL!	#NULL!	#NULL!	#NULL!	#NULL!	#NULL!
68	28.9199	2	1	10	1	8.7	0	1	1	1	0	4	0	1	0	1	0	1	1	1	0	1	1	0	18	10	12	50	8	14	22	0	1	0	1	0	#NULL!	0.796785	-0.246563	#NULL!	0.094344	-0.299419	#NULL!	#NULL!	#NULL!	#NULL!	#NULL!	#NULL!	#NULL!
69	19.5811	2	0	12	1	1.5	1	1	1	0	0	3	0	0	1	1	0	0	0	0	0	0	1	1	13	9	11	45	14	14	28	1	1	1	0	1	21.6128	0.799999	0.363169	-0.010082	-0.03213	-0.294976	-0.487317	#NULL!	#NULL!	#NULL!	#NULL!	#NULL!	#NULL!
70	22.5681	2	0	12	1	1.2	1	1	1	0	1	3	0	0	1	1	1	0	1	0	0	0	1	1	15	8	15	34.7826	4	7	11	0	1	0	0	0	20.5191	-0.014817	-0.45352	0.692214	-0.177941	0.739197	0.090399	#NULL!	#NULL!	#NULL!	#NULL!	#NULL!	#NULL!
[truncated: 1 more columns]
